# Supplementary material for: Hospital Length of Stay and Surgery among European Children with Rare Structural Congenital Anomalies—A Population-Based Data Linkage Study
Source: MDPI journal article supplement (doi:10.3390/ijerph20054387), 2023-03-01
Supplement: s1 [file s1]

**Supplementary Table S1:** Number of children in the EUROLinkCAT study

|                                     | Number of children                              |                  | Included in analysis<br>of 0-4 years | Included in analysis<br>of 0-9 years |
|-------------------------------------|-------------------------------------------------|------------------|--------------------------------------|--------------------------------------|
|                                     | Reference children                              | EUROCAT children |                                      |                                      |
| Finland                             | 911,679                                         | 38,324           | Yes                                  | Yes                                  |
| Denmark, Funen                      | 100,748                                         | 2,423            | Yes                                  | Yes                                  |
| UK, Wales                           | 531,784                                         | 17,448           | Yes                                  | Yes                                  |
| Italy, Tuscany                      | 23,503                                          | 4,225            | Yes                                  | No                                   |
| Italy, Emilia-Romagna               | 223,995                                         | 5,381            | Yes                                  | No                                   |
| Spain, Valencian Region             | 168,563                                         | 4,260            | Yes                                  | No                                   |
| UK, Thames Valley                   | Data for<br>reference children<br>not available | 3,845            | Yes                                  | Yes                                  |
| UK, Wessex                          |                                                 | 4,320            | Yes                                  | Yes                                  |
| UK, East Midlands & South Yorkshire |                                                 | 11,278           | Yes                                  | Yes                                  |

**Supplementary Table S2.** Rules for surgery definitions

| <b>Include as surgery</b>                                     | <b>Not include as surgery</b>                                     |
|---------------------------------------------------------------|-------------------------------------------------------------------|
| Dilatations with or without stent implantation                | Examinations/diagnostic procedure                                 |
| Removal of foreign bodies from bronchus, lungs and oesophagus | Removal of foreign bodies in open areas (nose, ear, throat, skin) |
| Drainage from internal organs                                 | Drainage with easy access by needle                               |
| Extraction of multiple teeth                                  | Extraction of one tooth only, other dental treatment              |
| Application of internal and external fixation to bone         | Closed manipulation/application traction of bones                 |
| Harvest of skin, bone, tendon                                 | Removal of suture, tube                                           |
|                                                               | Attention, irrigation, aspiration                                 |
